# Supplementary material
Source: PubMed Central journal article supplement (PMC7088897)
Supplement: pt9b00008_si_001.pdf [file pt9b00008_si_001.pdf]

# Targeting cannabinoid 1 and delta opioid receptor heteromers alleviates chemotherapy-induced neuropathic pain

Salvador Sierra<sup>1,\*</sup>, Achla Gupta<sup>1</sup>, Ivone Gomes<sup>1</sup>, Mary Fowkes<sup>2</sup>, Akila Ram<sup>3</sup>, Erin N. Bobeck<sup>3</sup>, Lakshmi A. Devi<sup>1\*</sup>

<sup>1</sup>Department of Pharmacological Sciences and <sup>2</sup>Department of Pathology, Icahn School of Medicine at Mount Sinai, New York, NY, USA;

<sup>3</sup>Department of Biology, Utah State University, UT, USA

\*Corresponding Author:

Lakshmi A. Devi

Department of Pharmacological Sciences  
Icahn School of Medicine at Mount Sinai,  
19-90 Annenberg Building,  
One Gustave L. Levy Place,  
New York, NY10029,  
E-mail: [Lakshmi.devi@mssm.edu](mailto:Lakshmi.devi@mssm.edu)

Current Address

Department of Physiology & Biophysics  
Molecular Medicine Research Building  
Virginia Commonwealth University  
1220 East Broad Street  
Richmond, VA, 23298  
Email: [Salvador.Sierra@vcuhealth.org](mailto:Salvador.Sierra@vcuhealth.org)

## Table of Contents

**Figure S1.** Validation of antibodies

**Figure S2.** Cellular location of CB<sub>1</sub>R-DOR heteromers in the dorsal region of the lumbar spinal cord of paclitaxel-treated mice using PLA

**Figure S3.** CB<sub>1</sub>R-DOR heteromers are increased in the basolateral amygdala of paclitaxel-treated mice

**Table S1.** Summary information of control and patients with chemotherapy-induced peripheral neuropathy (CIPN)

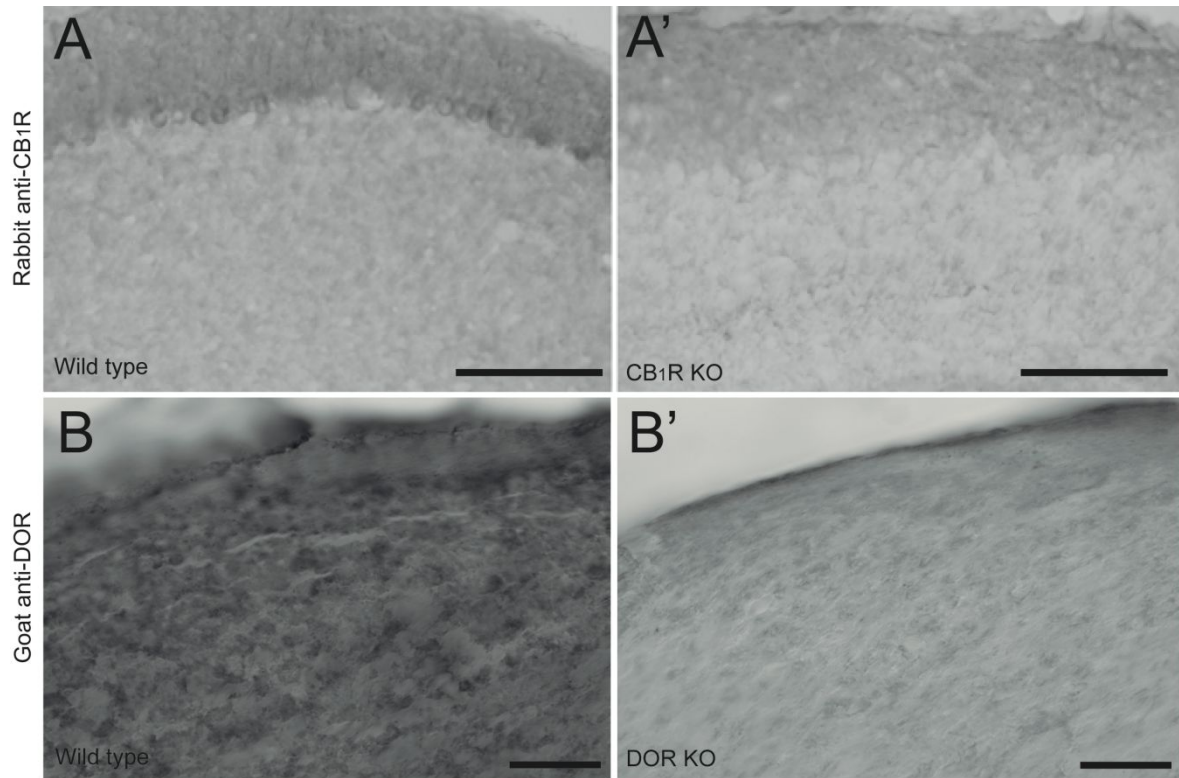

**Suppl. Fig.1**

**Supl Fig 1. Validation of antibodies.** CB<sub>1</sub>R and DOR staining is present in the cerebellar cortex or pontine gray of wild-type but not in CB<sub>1</sub>R or DOR knock-out mice respectively. Tissue sections were stained using a goat rabbit anti-CB<sub>1</sub>R or anti-DOR receptor antibody followed by HRP-conjugated anti-species IgG secondary antibodies, and reaction with diaminobenzidine.

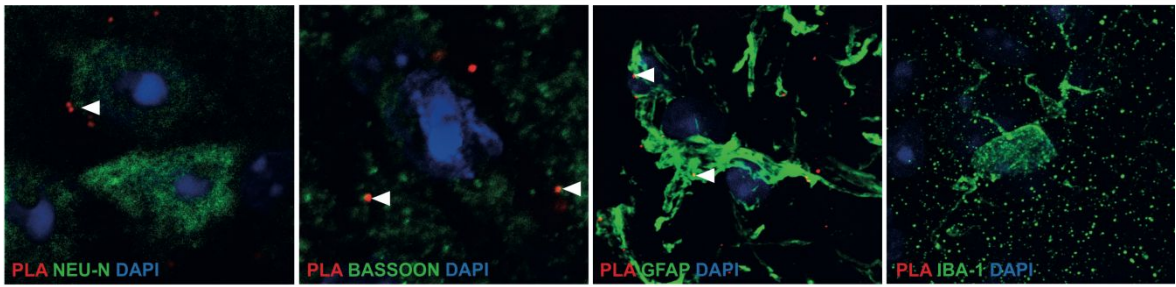

Suppl. Fig. 2

**Supl Fig 2 Detection of CB<sub>1</sub>R-DOR heteromers in the dorsal region of the lumbar spinal cord of paclitaxel-treated mice using PLA. CB<sub>1</sub>R-DOR heteromers are located in neurons (somatodendritic and presynaptic location) and astrocytes, but not in microglia.**

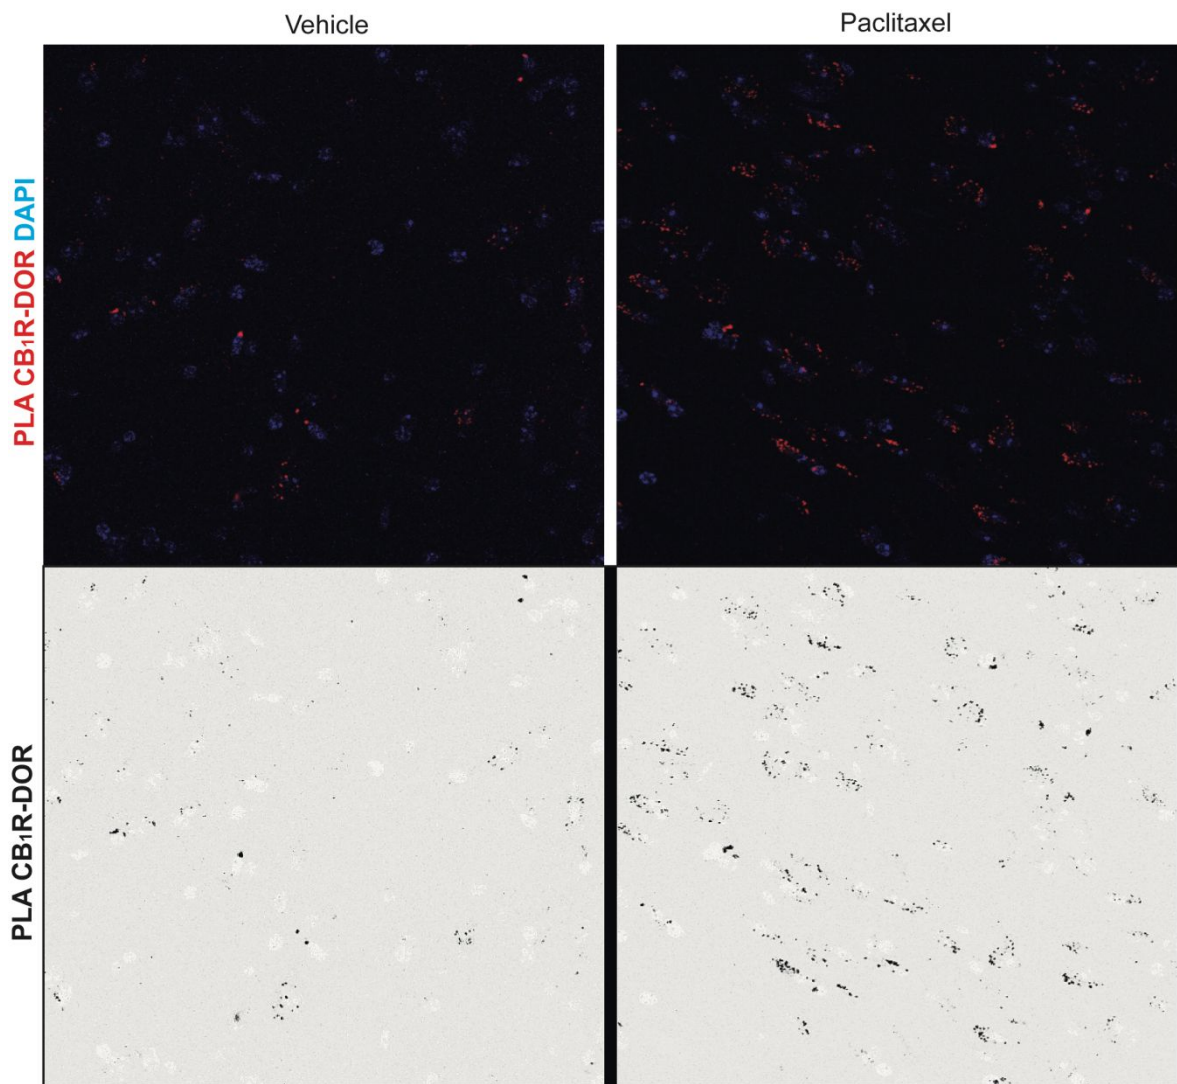

Suppl. Fig. 3

**Supl Fig 3. CB<sub>1</sub>R-DOR heteromers are increased in the basolateral amygdala of paclitaxel-treated mice.** CB<sub>1</sub>R-DOR heteromers (red dots in color panels, black dots in inverted color panels) are detected in the basolateral amygdala of control and paclitaxel-induced chemotherapy mice.

**Table S1.** Summary information of control and patients with chemotherapy-induced peripheral neuropathy (CIPN)

| <b>Control group</b> |                    |                           |                            |
|----------------------|--------------------|---------------------------|----------------------------|
| <b>sex</b>           | <b>age (years)</b> | <b>cause of death</b>     | <b>PLA (CB1R-DOR) dots</b> |
| female               | 68                 | cardiac arrest            | 364                        |
| female               | 30                 | cardiorespiratory failure | 127                        |
| female               | 72                 | cardiac arrest            | 110                        |
| male                 | 42                 | surgery complication      | 313                        |
| male                 | 57                 | cardiac arrest            | 122                        |
| male                 | 34                 | septic shock              | 147                        |
| male                 | 38                 | cardiac arrest            | 257                        |
| male                 | 50                 | multiorgan failure        | 164                        |
| male                 | 64                 | procedure complication    | 218                        |
| male                 | 56                 | cardiac arrest            | 358                        |

| <b>CIPN group</b> |                    |                   |                         |                            |
|-------------------|--------------------|-------------------|-------------------------|----------------------------|
| <b>sex</b>        | <b>age (years)</b> | <b>disease</b>    | <b>drugs</b>            | <b>PLA (CB1R-DOR) dots</b> |
| female            | 49                 | pharynx carcinoma | paclitaxel, carboplatin | 284                        |
| female            | 51                 | breast cancer     | paclitaxel, carboplatin | 721                        |
| female            | 51                 | multiple myeloma  | cisplatin               | 370                        |
| male              | 48                 | larynx cancer     | paclitaxel, oxaliplatin | 362                        |
| male              | 75                 | larynx cancer     | paclitaxel              | 426                        |
| male              | 70                 | lung cancer       | paclitaxel              | 588                        |
| male              | 65                 | B-cell lymphoma   | oxaliplatin             | 420                        |
| male              | 51                 | breast cancer     | paclitaxel              | 728                        |
| male              | 73                 | tongue cancer     | cisplatin               | 631                        |
